# Supplementary material for: Massive immune response against IVIg interferes with response against other antigens in mice: A new mode of action?
Source: PubMed Central journal article supplement (PMC5638328; doi:10.1371/journal.pone.0186046), 2017-10-12
Supplement: pone.0186046.s002.pdf [file pone.0186046.s002.pdf]

**A**

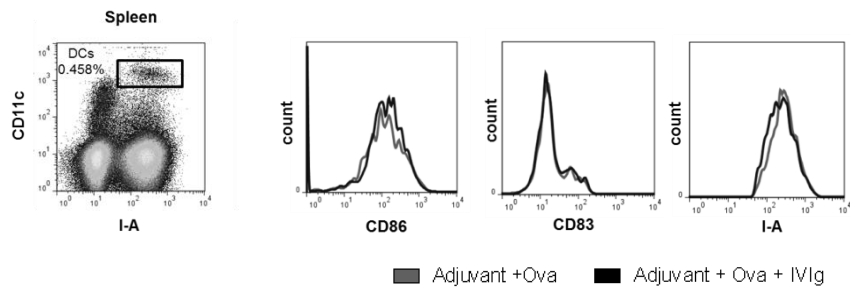

**B**

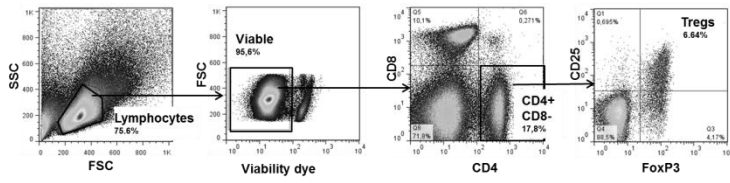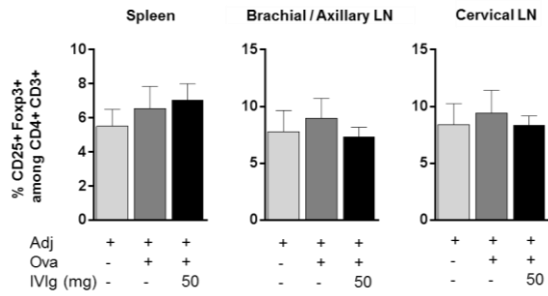

|                       | Foxp3       | CTLA-4      | CD25        |
|-----------------------|-------------|-------------|-------------|
| spleen                | 1.11 ± 0.05 | 1.15 ± 0.12 | 1.22 ± 0.16 |
| axillary/ brachial LN | 1.03 ± 0.03 | 1.11 ± 0.13 | 1.17 ± 0.15 |
| cervical LN           | 1.03 ± 0.05 | 1.02 ± 0.18 | 1.11 ± 0.23 |
