# Supplementary material for: Massive immune response against IVIg interferes with response against other antigens in mice: A new mode of action?
Source: PubMed Central journal article supplement (PMC5638328; doi:10.1371/journal.pone.0186046), 2017-10-12

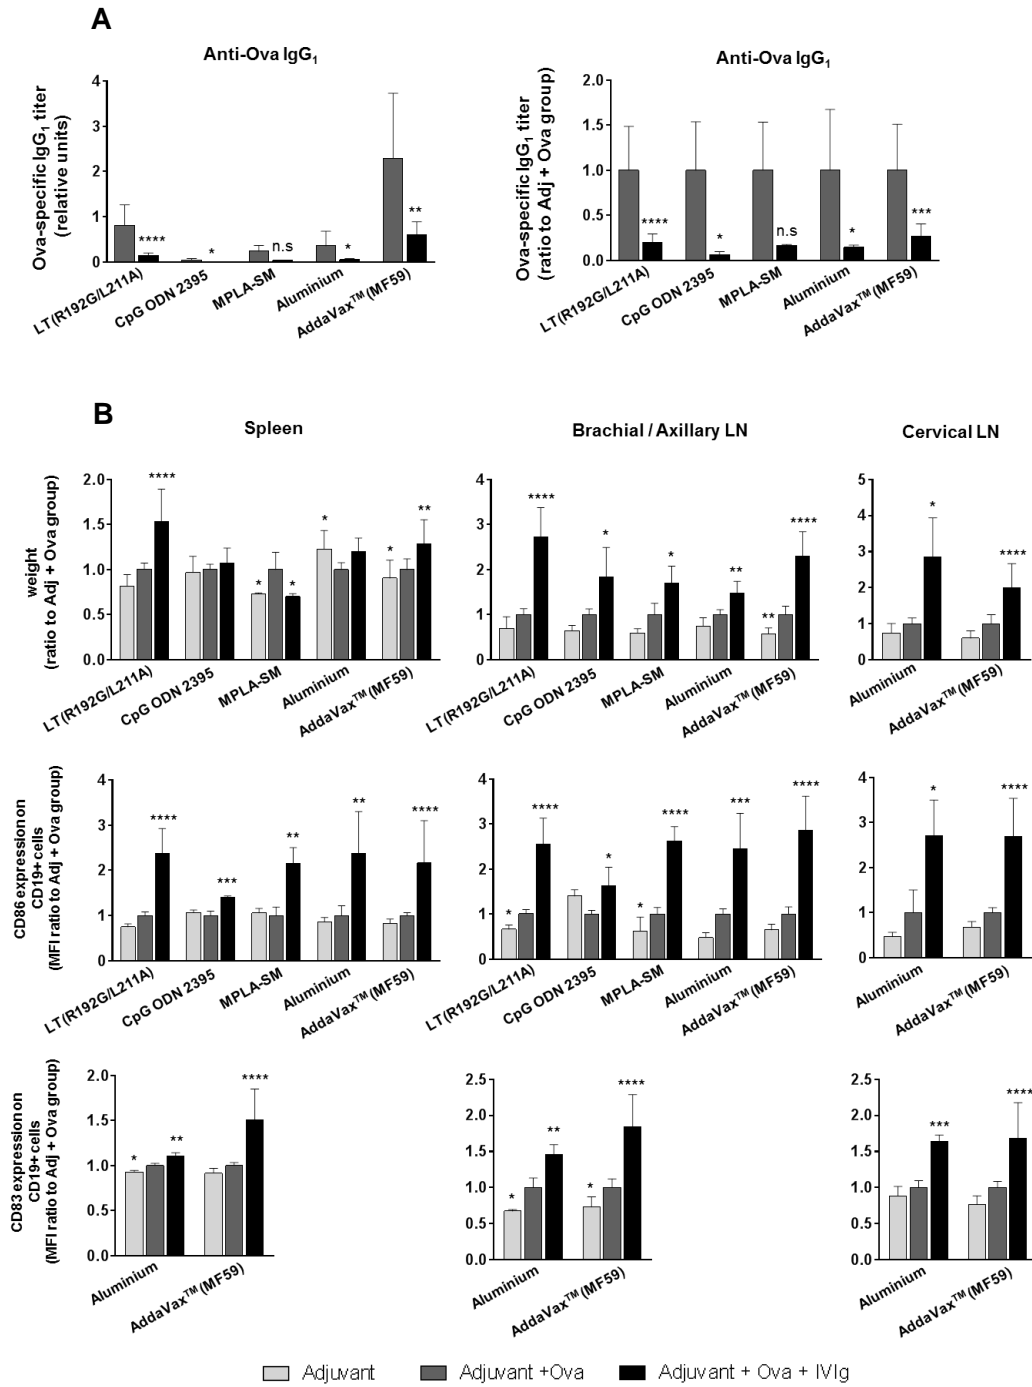

Supplement: pone.0186046.s004.pdf [file pone.0186046.s004.pdf]
